# Supplementary material
Source: PubMed Central journal article supplement (PMC10231202)

# Supplementary Figures

## **Kyphosid fish microbiome adaptations to sulfated dietary polysaccharides**

Sheila Podell, Aaron Oliver, Linda Wegley Kelly, Wesley Sparagon, Alvaro M. Plominksky, Robert S. Nelson, Lieve M. L. Laurens, Simona Augyte, Neil A. Sims, Craig E. Nelson, Eric E. Allen

## **Contents**

### **Supplementary Figure S1. Fish gut sample distribution of algal degradative enzyme keywords.**

Prokka annotation keywords for assembled contigs have been normalized for total number of predicted proteins in each fish sample. Full data and significance calculations are provided in Supplementary Dataset S1

### **Supplementary Figure S2. Separation distances for CAZy and SulfAtlas class pairs.**

A) fish metagenomes. B) Terrestrial ruminant metagenomes. Complete data is presented in Supplementary Dataset 3.

**Supplementary Figure S1. Fish gut sample distribution of algal degradative enzyme keywords.** Prokka annotation keywords for assembled contigs have been normalized for total number of predicted proteins in each fish sample. Full data and significance calculations are provided in **Supplementary Dataset S1**.

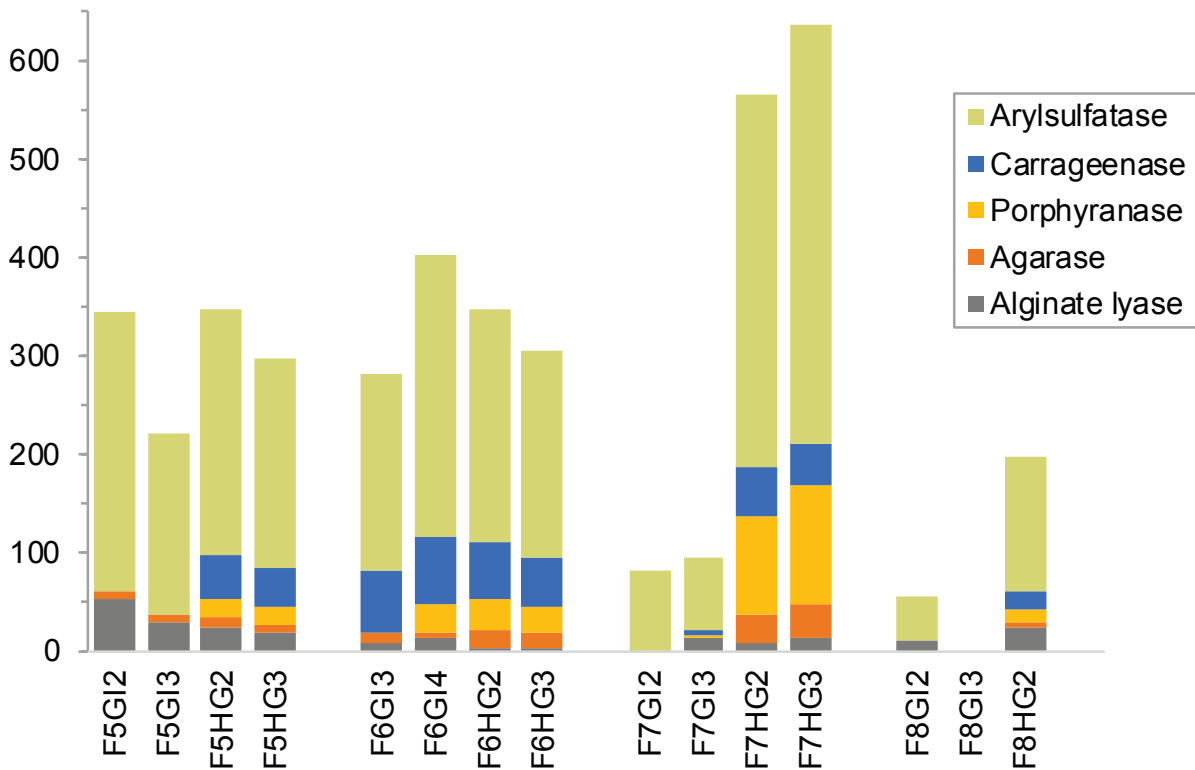

## Supplementary Figure S2. Separation distances for CAZy and SulfAtlas class pairs.

A) fish metagenomes. B) Terrestrial ruminant metagenomes. Complete data is presented in **Supplementary Dataset 3**.

**A**

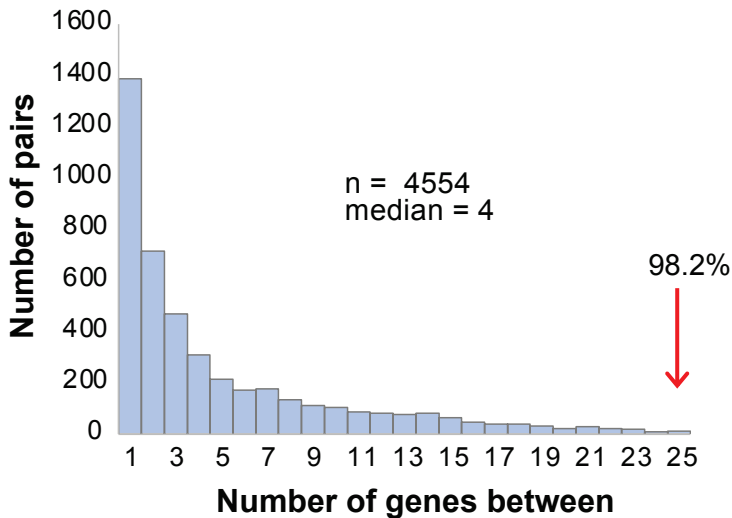

**B**

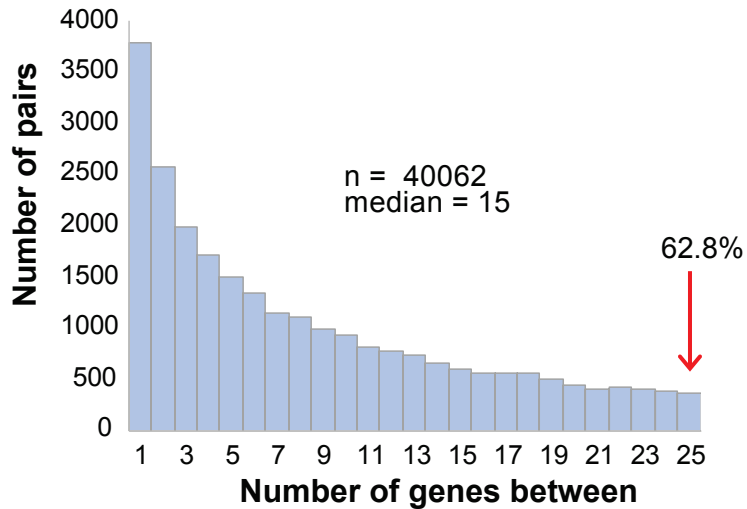

Supplement: aem.02154-22-s0001.pdf [file aem.02154-22-s0001.pdf]
